# Supplementary material for: Solid-phase synthesis of oxaliplatin–TATpeptide bioconjugates
Source: Royal Society of Chemistry journal article supplement (doi:10.1039/c2dt12024k), 2012-01-01

## Supporting Information

### Solid-Phase Synthesis of Oxaliplatin-TAT Peptide Bioconjugates

Sergey Abramkin<sup>a</sup>, Seied M. Valiahdi<sup>a</sup>, Michael A. Jakupec<sup>a</sup>, Mathea S. Galanski\*<sup>a</sup>,  
Nils Metzler-Nolte<sup>b</sup> and Bernhard K. Keppler\*<sup>a</sup>

<sup>a</sup>Institute of Inorganic Chemistry, University of Vienna, Währinger Strasse 42, A-1090 Vienna, Austria

<sup>b</sup>Lehrstuhl für Anorganische Chemie I – Bioanorganische Chemie, Fakultät für Chemie und Biochemie, Ruhr-Universität Bochum, Universitätsstrasse 150, D-44801 Bochum, Germany

#### Contents

|         |                                                                                                                        |
|---------|------------------------------------------------------------------------------------------------------------------------|
| page S2 | Figure S1 with HPLC purification of conjugates <b>2</b> and <b>3</b>                                                   |
| page S3 | Figure S2 with analytical HPLC traces of purified conjugates <b>2</b> and <b>3</b>                                     |
| page S4 | Figure S3 with ESI-MS spectra of conjugate <b>2</b>                                                                    |
| page S5 | Figure S4 with ESI-MS spectra of conjugate <b>3</b>                                                                    |
| page S6 | Figure S5 with MALDI-TOF spectra of conjugates <b>2</b> and <b>3</b>                                                   |
| page S7 | Figure S6 with concentration-effect curves of complexes <b>1</b> - <b>4</b> in CH1, SK-OV-3, A549 and SW480 cell lines |

**Figure S1.** HPLC purification of of conjugates **2** and **3**. Column: GROM Saphir C18 column (25 mm × 250 mm), eluents: 0.1% TFA in water and 0.1% TFA in methanol. Monoconjugate **2** was eluted at 32 min, diconjugate **3** at 35 min.

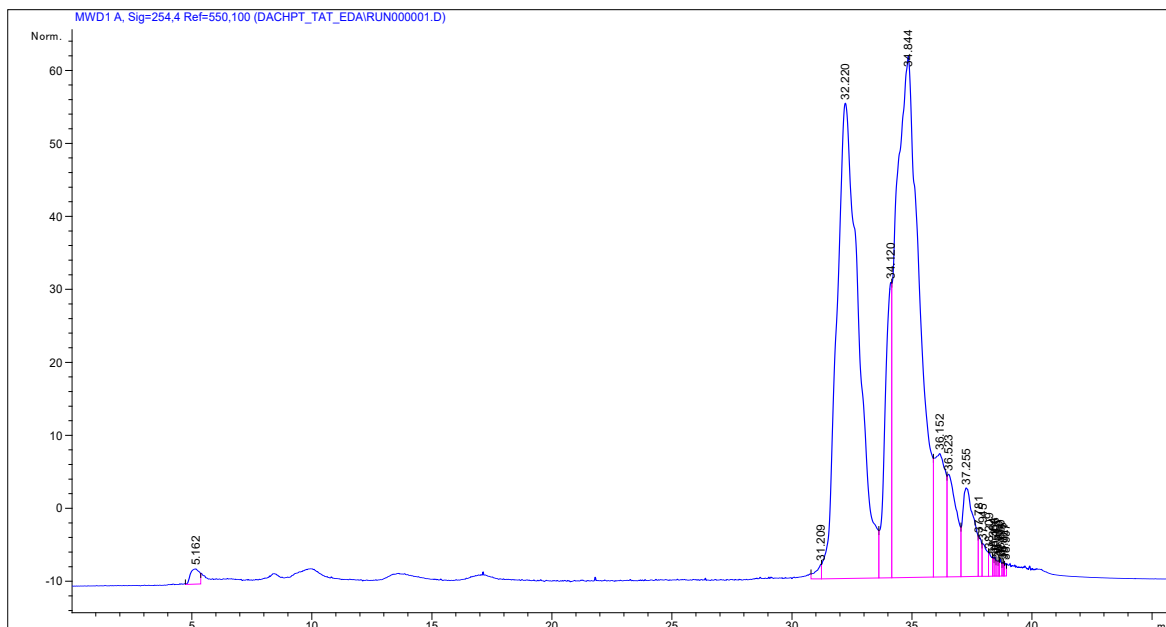

Gradient conditions:

| time, min | % MeOH | Rate, ml/min |
|-----------|--------|--------------|
| 0         | 20     | 20           |
| 25        | 20     | 20           |
| 35        | 40     | 20           |
| 45        | 20     | 20           |

**Figure S2.** Analytical HPLC traces of purified conjugates **2** (A, 9.28 min) and **3** (B, 9.74 min). Column : Agilent ZORBAX Bonus-RP (4.6 mm × 250 mm ), eluents: 0.1% TFA in water and 0.1% TFA in methanol.

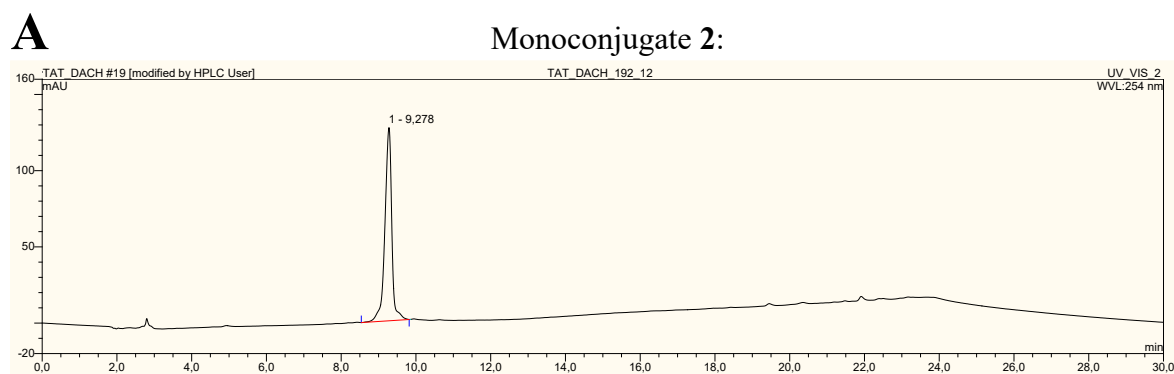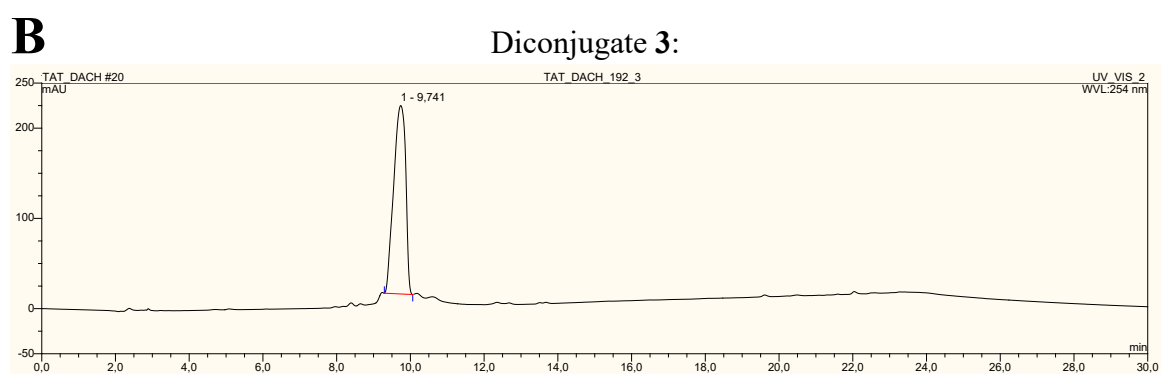

Gradient conditions:

| time, min | % MeOH | Rate, ml/min |
|-----------|--------|--------------|
| 0         | 5      | 0.8          |
| 20        | 95     | 0.8          |
| 3         | 5      | 0.8          |

**Figure S3.** ESI-MS characterization of conjugate **2**.

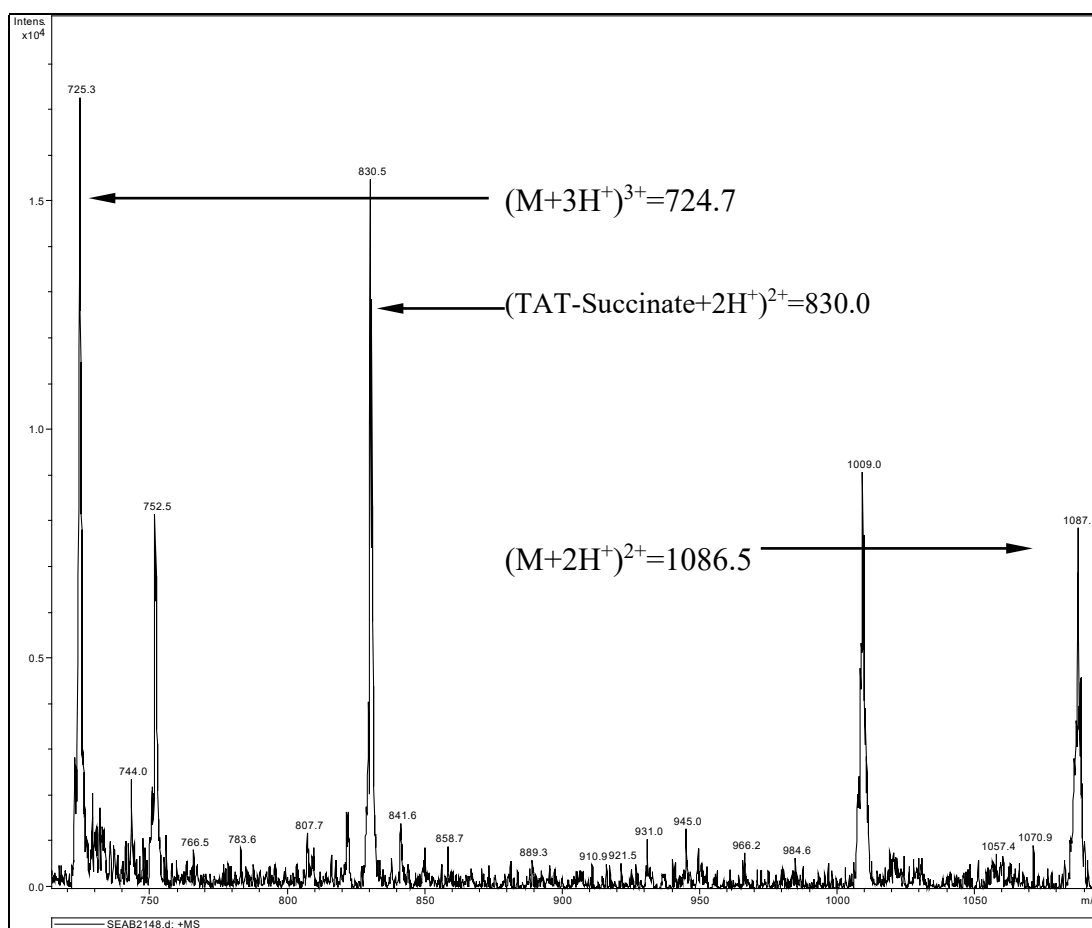

Monoconjugate **2**: Exact Mass: 2171.05  
TAT-Succinate: Exact Mass: 1657.98

**Figure S4.** ESI-MS characterization of conjugate **3**.

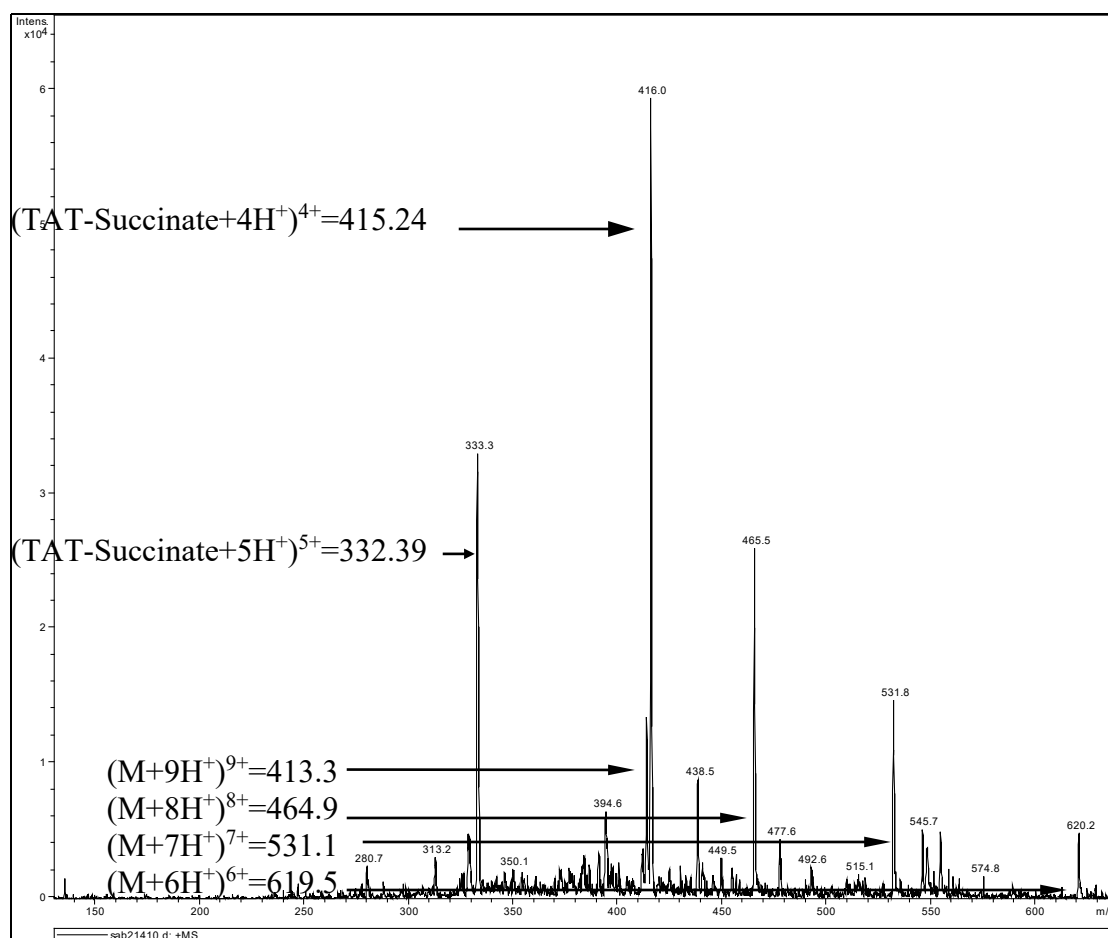

Diconjugate **3**: Exact Mass: 3711.01  
TAT-Succinate: Exact Mass: 1657.98

**Figure S5.** MALDI-TOF characterization of conjugates **2** and **3**.

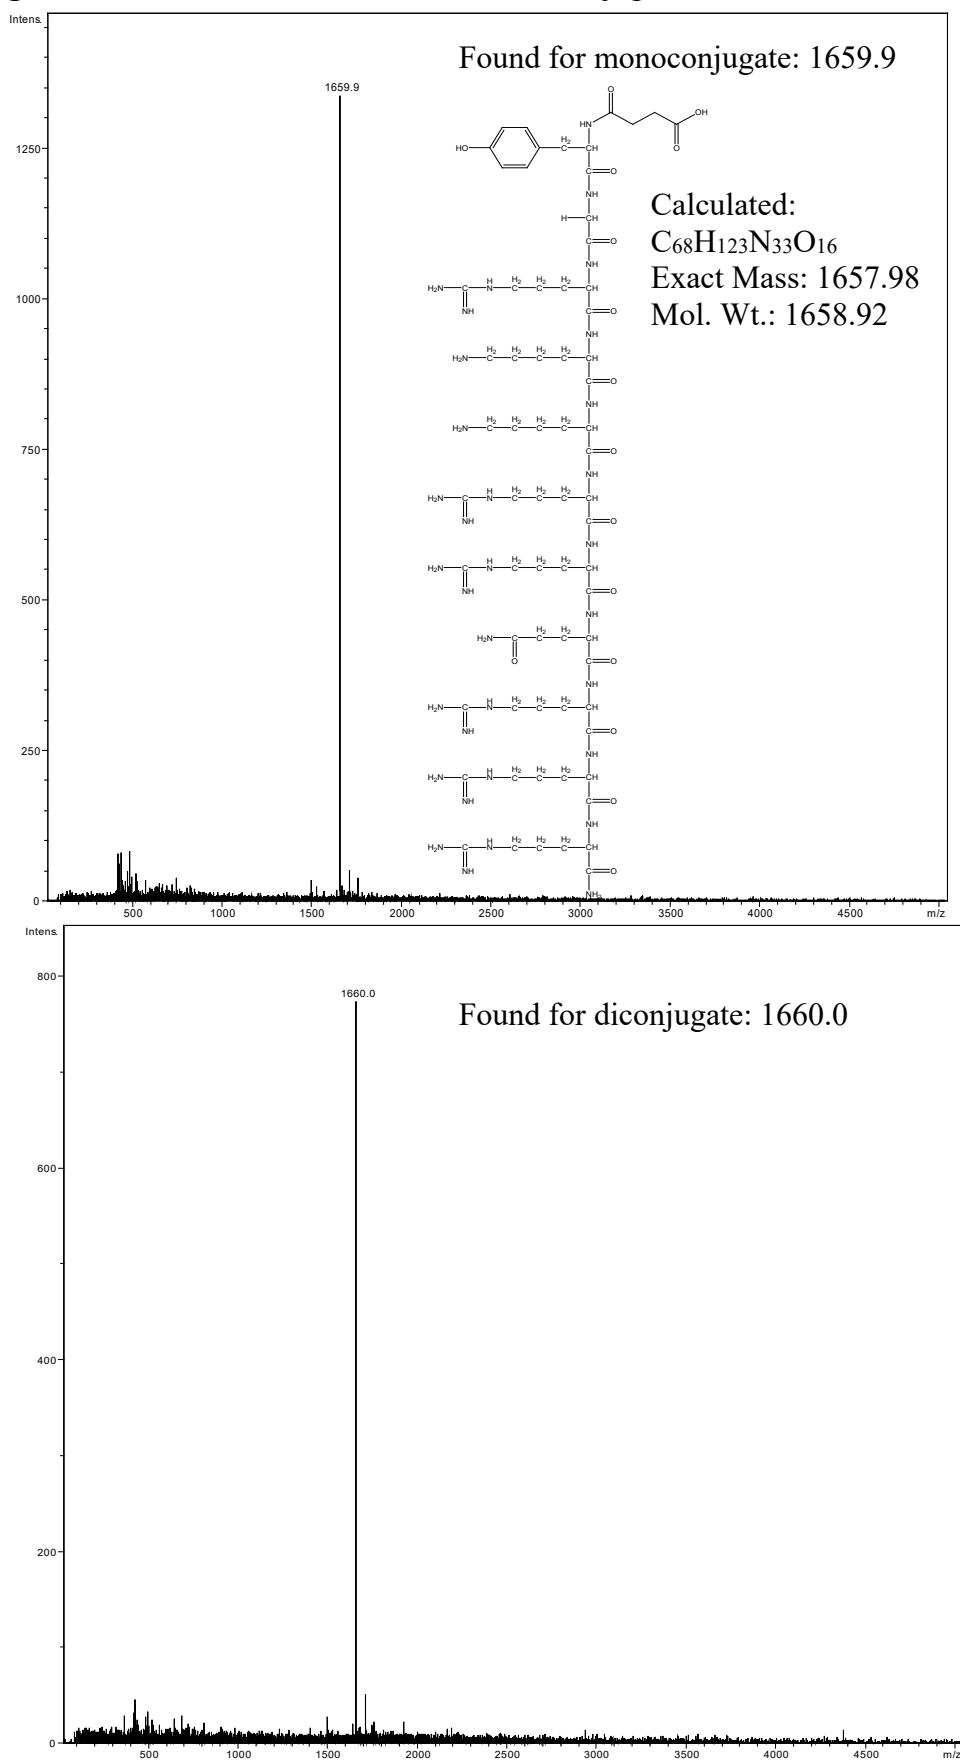

**Figure S6.** Concentration-effect curves of conjugates **2** and **3** and the precursor complex **1** and its amide derivative **4** in CH1 (A), SK-OV-3 (B), SW480 (C) and A549 (D) cell lines obtained by the MTT assay (96 h exposure)

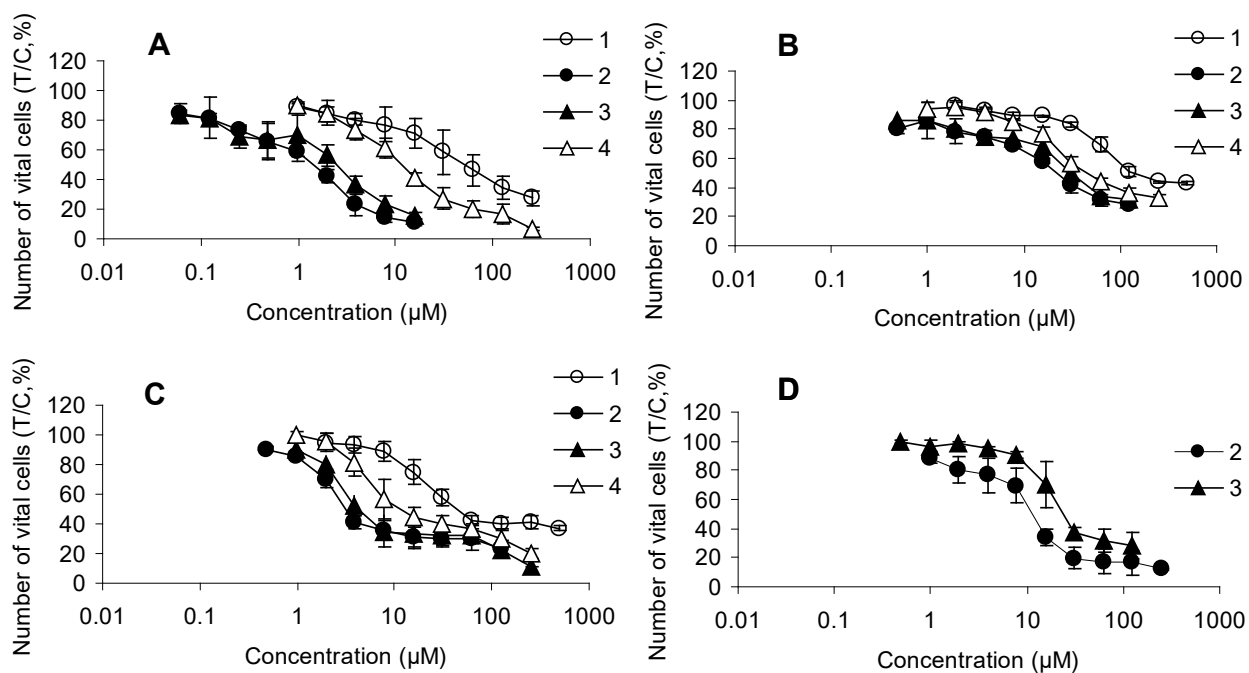

Supplement: c2dt12024k.pdf [file c2dt12024k.pdf]
